# Supplementary material for: Hyperbranched conjugated polymers containing 1,3-butadiene units: metal-free catalyzed synthesis and selective chemosensors for Fe3+ ions
Source: Royal Society of Chemistry journal article supplement (doi:10.1039/c7ra00540g), 2017-01-01
Supplement: c7ra00540g1.pdf [file c7ra00540g1.pdf]

Supporting Information for:

Hyperbranched conjugated polymers containing 1,3-butadiene units:  
metal-free catalyzed synthesis and selective chemosensor for Fe<sup>3+</sup> ion

Chunxin Luo, Yating Liu, Qi Zhang, Xuediao Cai\*

*Key Laboratory of Macromolecular Science of Shaanxi Province, School of Chemistry and Chemical Engineering,*

*Shaanxi Normal University, Xi'an, 710062, China*

Corresponding author: E-mail: [xdcai@snnu.edu.cn](mailto:xdcai@snnu.edu.cn)

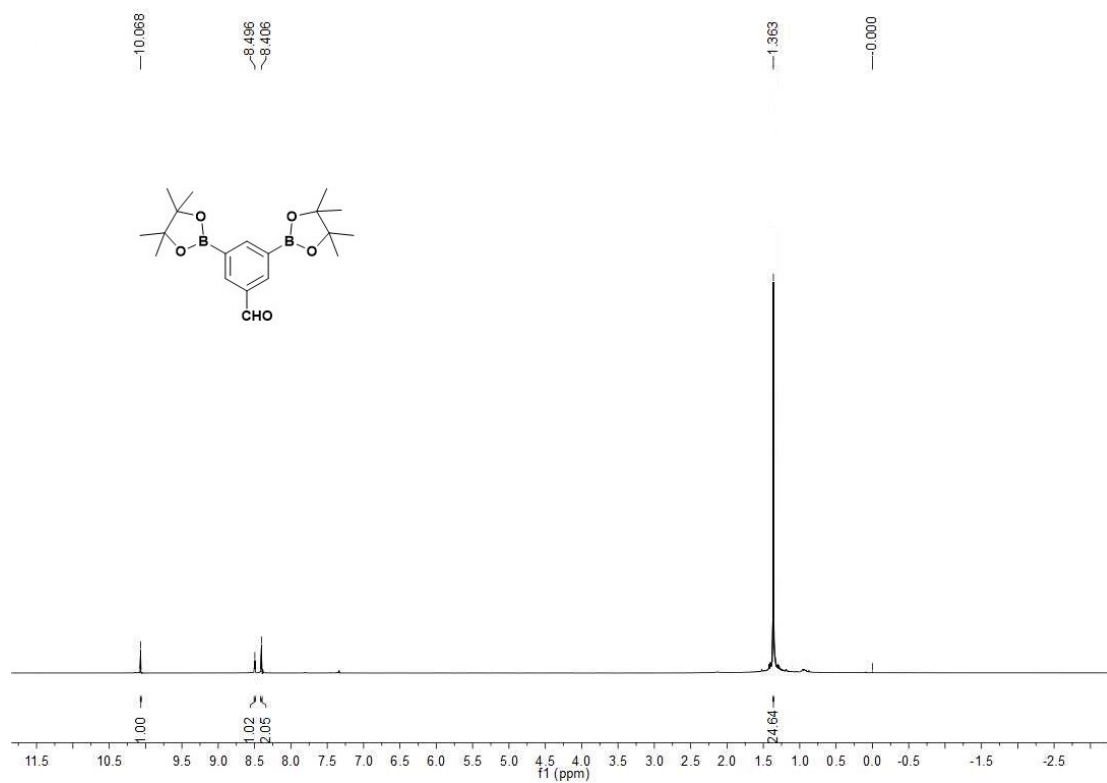

Figure S1. <sup>1</sup>H NMR spectrum of 1 in CDCl<sub>3</sub>.

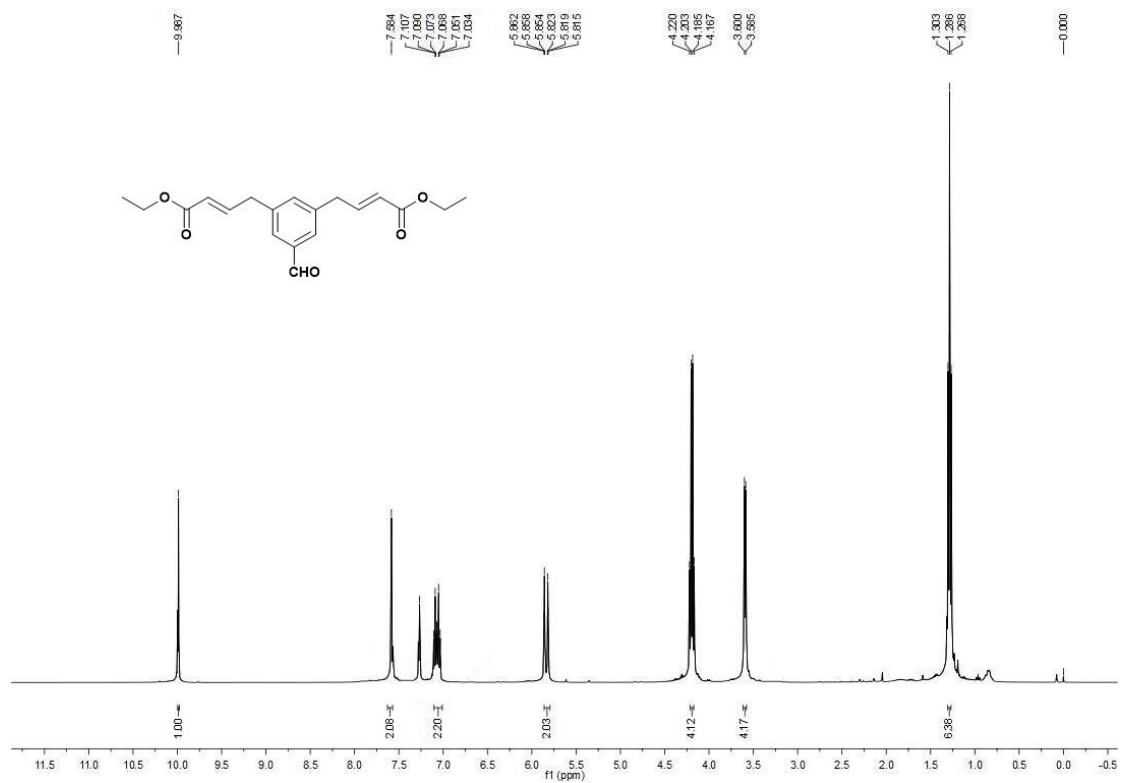

Figure S2. <sup>1</sup>H NMR spectrum of M1 in CDCl<sub>3</sub>.

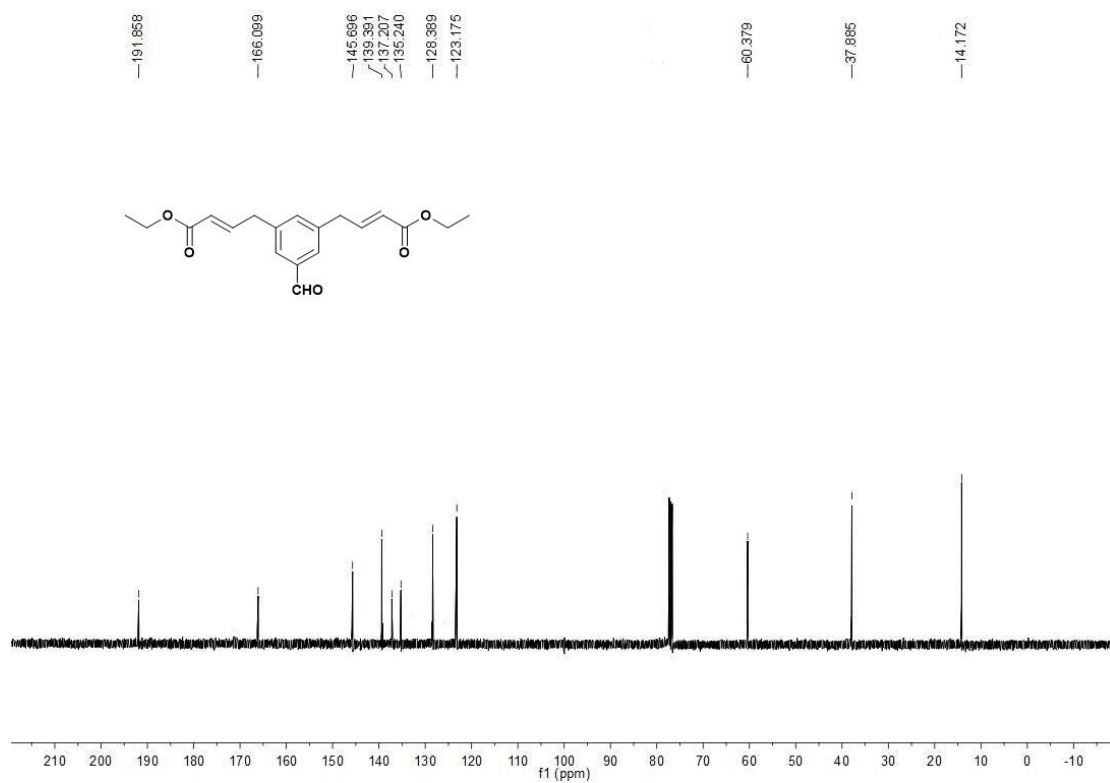

Figure S3. <sup>13</sup>C NMR spectrum of M1 in CDCl<sub>3</sub>.

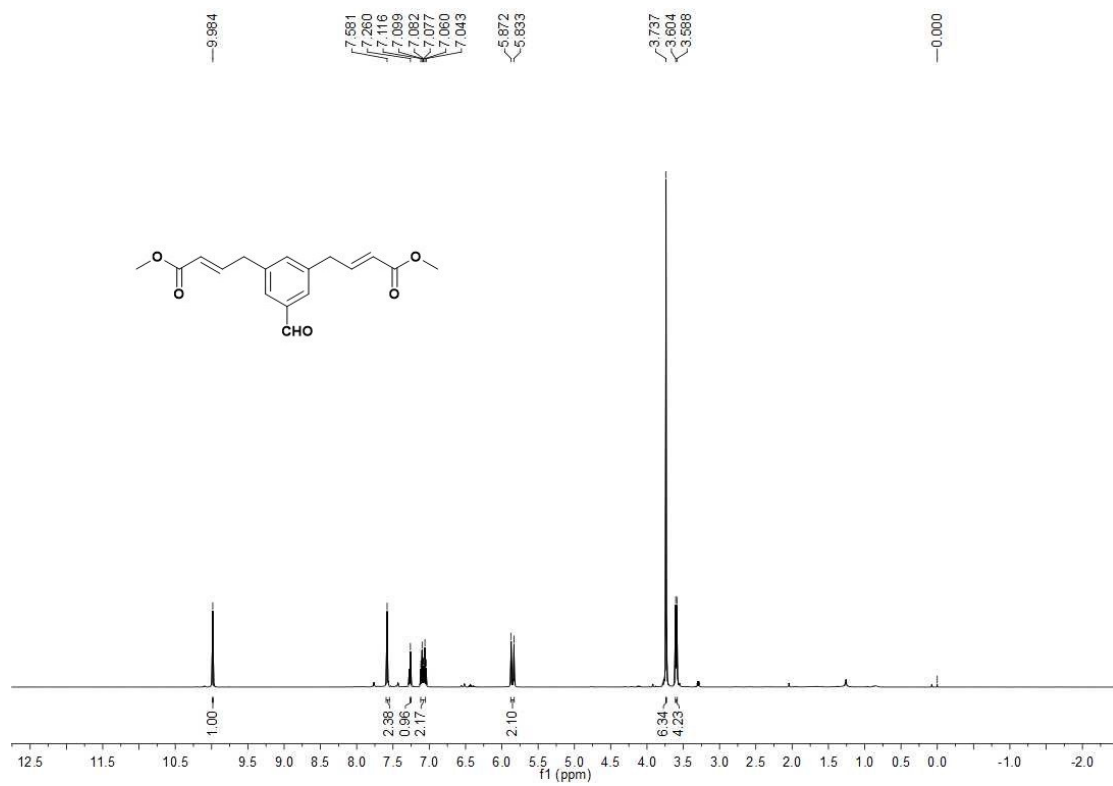

Figure S4. <sup>1</sup>H NMR spectrum of M2 in CDCl<sub>3</sub>.

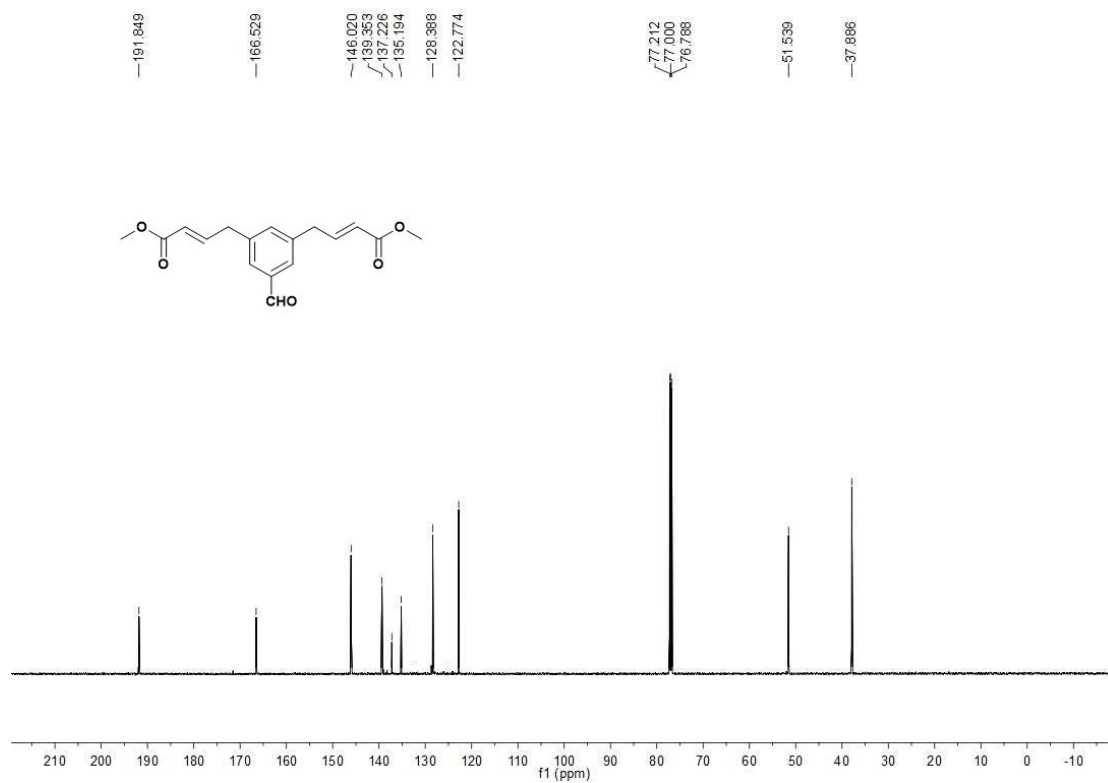

Figure S5.  $^{13}\text{C}$  NMR spectrum of M2 in  $\text{CDCl}_3$ .

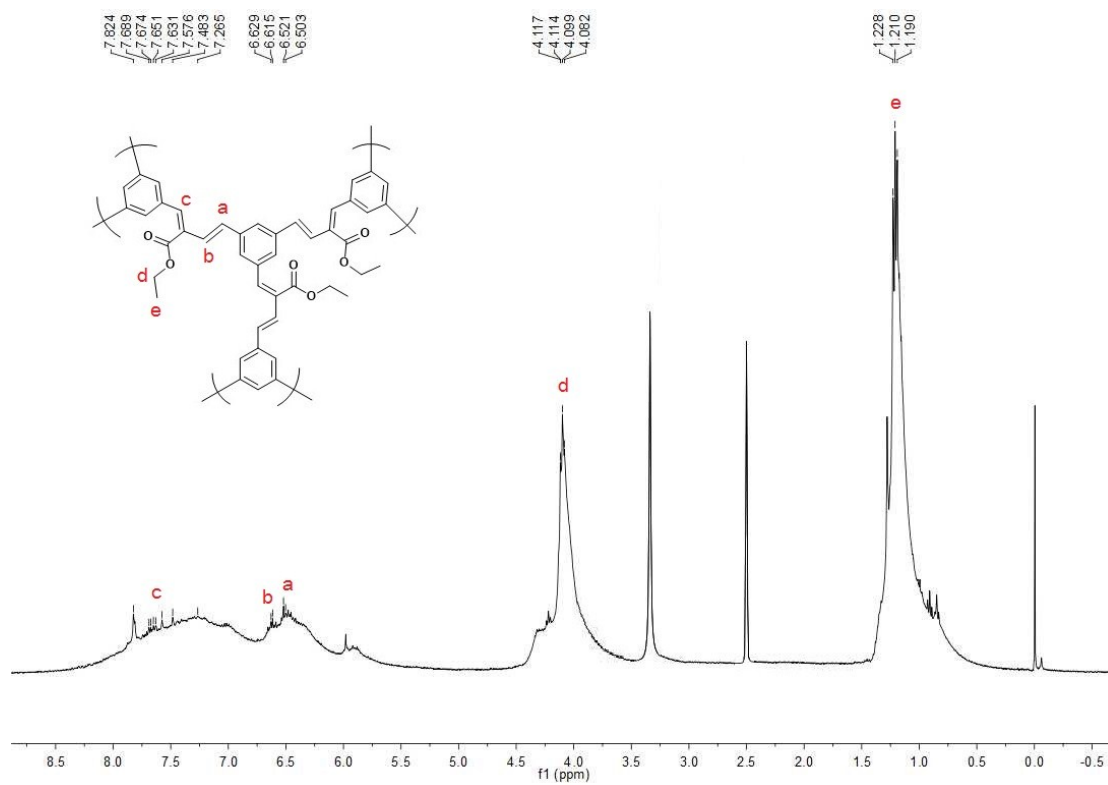

Figure S6.  $^1\text{H}$  NMR spectrum of P1 in DMSO- $d_6$ .

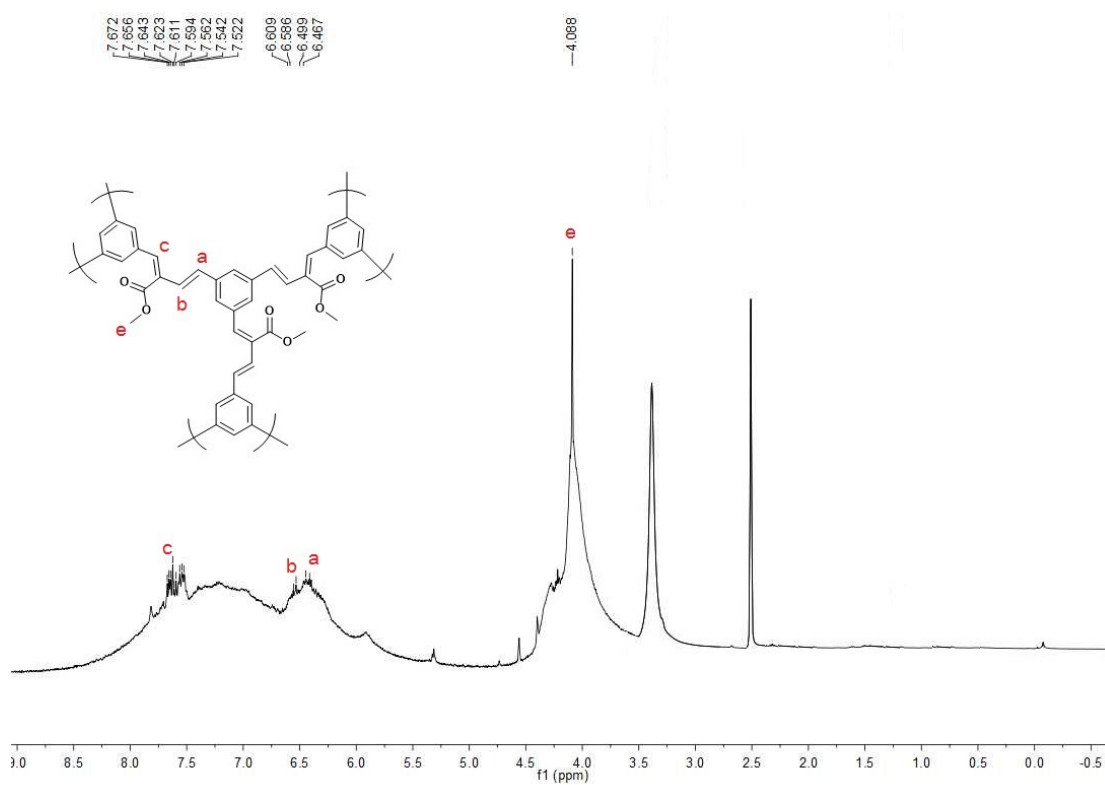

Figure S7.  $^1\text{H}$  NMR spectrum of P2 in DMSO- $d_6$ .

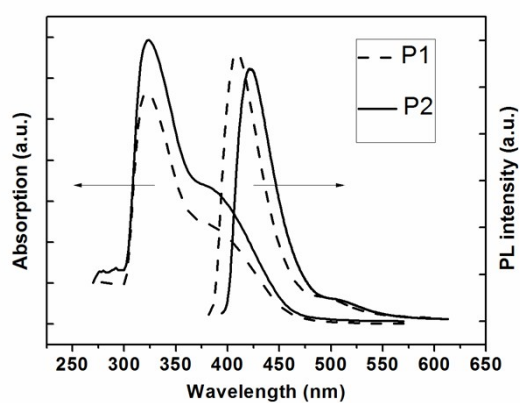

Figure S8. UV-vis absorption spectra and photoluminescence spectra of the polymers in THF

solutions

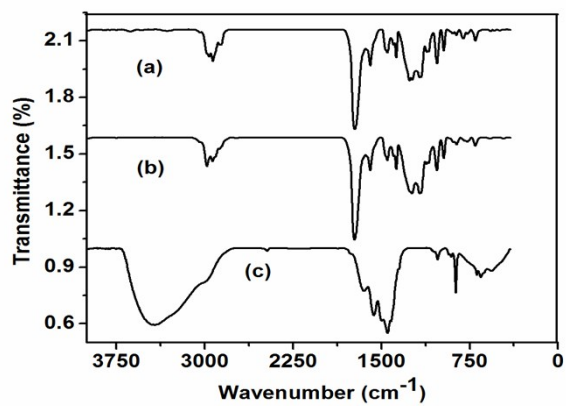

Figure S9. IR spectra of polymers P1 (a), P2 (b) and P3 (c).

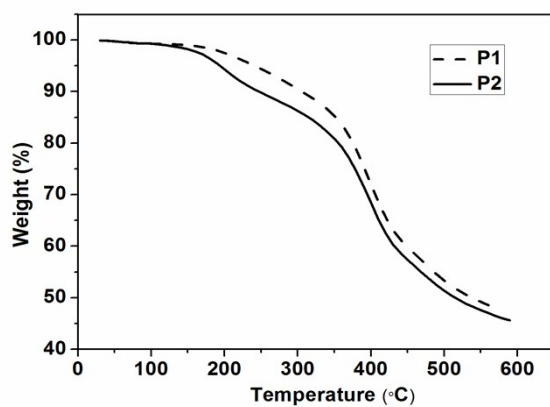

Figure S10. TGA curves of polymers at a scan rate of 20 °C min<sup>-1</sup> under nitrogen atmosphere.

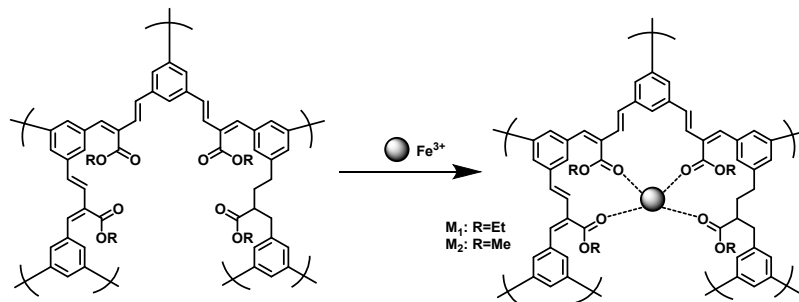

Figure S11. Proposed mechanism of P1 and P2 fluorescence quenching induced by  $\text{Fe}^{3+}$ .

Figure S12. (a): UV-vis absorption spectra of P2; (b): fluorescence spectra and images of P2.

Figure S13. (a): Fluorescence response of P2 to  $\text{Fe}^{3+}$  in THF solution; (b): The concentration line chart of P2.

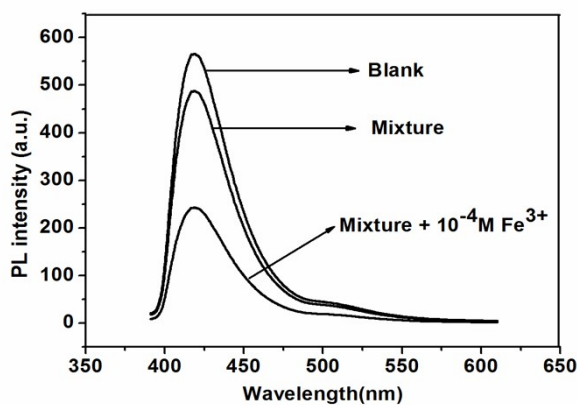

Figure S14. Fluorescence change of P2 upon titration with metal ion mixtures (concentration of each metal ion was  $10^{-4}$  M) with or without  $\text{Fe}^{3+}$  in THF solution.

Figure S15. (a): Fluorescence response of P3 to  $\text{Fe}^{3+}$  in 10 mM  $\text{NaH}_2\text{PO}_4$ -  $\text{Na}_2\text{HPO}_4$  buffer. (b):

The concentration line chart of P3.
